# Supplementary material for: Effect of common and experimental anti-tuberculosis treatments on Mycobacterium tuberculosis growing as biofilms
Source: PeerJ. 2016 Nov 22;4:e2717. doi: 10.7717/peerj.2717 (PMC5126618; doi:10.7717/peerj.2717)
Supplement: Data S1 [file peerj-04-2717-s001.xlsx]

## Sheet: Figure 2 
Bioluminescence 7 days post treatment - all compounds in mg/L
Pyrazinamide	1000	500	250	125	62.50	31.25	15.63	7.80	3.90	0
	1300	3898	5914	8968	11172	6296	7810	9974	6754	4442
	1834	3250	5606	5250	9106	7732	8620	11606	7190	10568
	1008	2158	5182	6810	6570	6770	6750	6330	6236	8154
	1244	2314	5554	8190	6862	8086	7852	7994	7538	9568
	914	2344	3310	3916	5114	5170	5274	6240	6200	7286
	1646	1782	4948	4014	7918	8874	7896	8926	7558	8208
Rifampicin	128	64	32	16	8	4	2	1	0.5	0
	24	44	58	50	46	70	140	1022	2704	9940
	28	58	54	40	44	60	108	1234	2846	10532
	30	50	70	72	54	84	620	1740	2814	7500
	22	66	50	46	42	98	374	938	2976	7378
	30	140	188	86	78	106	152	712	1820	10384
	28	136	108	76	82	58	208	376	2528	8360
Isoniazid	256	128	64	32	16	8	4	2	1	0
	242	460	748	268	514	216	268	334	492	7152
	440	1728	1016	64	140	582	1286	664	3146	7706
	28	66	378	210	320	64	306	232	958	5948
	1814	534	114	688	400	2332	142	344	932	6650
	28	1070	1044	338	536	446	476	564	762	5384
	76	850	342	80	126	202	102	292	642	5474
Ethambutol	2000	1000	500	250	125	62.5	32	16	8	0
	904	2838	1656	1892	1650	1552	1920	2064	4150	10218
	702	3372	2420	2936	3008	878	1990	6614	3356	7860
	3056	1842	1238	1804	2828	2424	7506	1092	2696	9282
	1112	3886	3466	1882	4366	1936	10296	6472	1932	7446
	1598	3432	4288	1310	2502	2344	1912	4776	4856	8572
	462	776	494	774	1676	2690	476	1302	1176	9958
Streptomycin	2000	1000	500	250	125	62.5	32	16	8	0
	28	38	42	58	68	486	650	638	3008	11530
	42	74	44	70	68	146	228	1326	2752	11702
	40	38	150	102	1060	242	2792	2548	5948	19175
	152	102	52	78	198	154	1688	802	4914	21470
	40	68	70	74	138	188	428	2564	2846	10250
	354	264	210	116	88	120	206	1836	3672	9172
Amikacin	1000	500	250	125	62.50	31.25	15.63	7.80	3.90	0
	52	36	24	100	70	128	802	1242	6944	14541
	26	24	32	34	258	666	1850	1774	2230	12914
	110	154	308	1284	5956	7890	8006	10118	13442	9108
	74	128	194	854	624	988	1526	1804	3646	9144
	34	24	28	38	520	3448	320	7206	10130	8586
	48	90	112	74	208	410	160	2556	12768	8582
Rifabutin	128	64	32	16	8	4	2	1	0.5	0
	22	24	26	30	30	28	72	72	608	8792
	36	58	82	88	84	132	144	1142	2054	13128
	58	72	66	58	98	650	1708	2890	4144	7888
	110	64	72	160	234	168	180	248	996	9458
	32	48	38	78	58	60	244	1592	2544	5382
	40	74	66	70	114	152	242	1632	1796	6274
Pretomanid	40	20	10	5	2.5	1.25	0.63	0.32	0.16	0
	6012	10558	13098	11522	15521	11840	13418	15471	16627	16001
	5722	10544	7150	9752	9782	9296	11010	8304	20590	13124
	4082	6620	9038	9466	11926	10724	11474	12416	13816	7934
	4466	6640	8808	8896	9532	13996	9958	9100	9906	7346
	4418	8470	8106	7096	10942	12000	9366	7554	9378	9552
	4626	7530	6524	11724	12138	11596	10514	6130	10432	7932
Delamanid	54	27	13.5	6.75	3.4	1.7	0.85	0.4	0.2	0
	1018	2614	4296	6180	6154	7220	12448	10042	11512	15409
	868	4170	4548	6838	3638	7652	13366	13236	13450	11318
	1986	6642	7672	15833	7040	10454	14971	10280	13824	11250
	1950	5494	11282	14997	8808	12508	11448	13094	10680	10256
	3158	2582	10662	5688	12816	9276	8284	6486	5954	11314
	4204	6978	5434	3966	7272	7978	9818	7010	7434	15555
SN30488	40	20	10	5	2.5	1.25	0.63	0.32	0.16	0
	2964	4070	778	1750	6142	10296	2632	5158	8076	14233
	168	1692	2386	3496	7506	8288	8610	11036	9264	13908
	1606	4038	6324	6754	9912	9870	11430	10102	12388	7742
	2128	5524	5942	10886	8116	7568	10906	11312	17741	9898
	394	2716	4282	7370	4024	10136	2900	7968	9878	9340
	1108	6852	7162	5470	10708	8442	7354	5230	7304	10738
QOA1	128	64	32	16	8	4	2	1	0.5	0
	2314	3654	3950	4568	4338	7838	16811	10674	11040	9986
	7550	1846	4410	5118	4090	5664	12320	7436	10208	10010
	7980	6006	8422	9492	8348	16527	19663	19131	17095	12446
	4582	8036	3790	4194	3432	8416	11292	9768	15663	7736
	8840	3774	4696	6542	8904	9836	10390	12870	14629	9526
	3656	1260	8124	7264	2620	7222	8756	7554	7372	6470
QOA2	128	64	32	16	8	4	2	1	0.5	0
	962	1698	2336	3402	4224	3654	8378	15205	9398	11642
	1228	2414	3490	2718	9394	7236	11238	21300	10934	10736
	932	2114	2800	6198	5788	8234	10966	14799	15925	13044
	4046	3906	5680	9356	8940	13910	15077	18351	16493	13146
	3638	3972	5546	9226	11706	11514	14749	10684	15225	12314
	6382	4042	5836	9816	12010	12160	17445	11196	13996	9988
QOA3	128	64	32	16	8	4	2	1	0.5	0
	3610	9478	6374	4826	5636	7202	7308	10566	15147	12590
	3104	3534	3252	3446	3938	4332	5974	9898	8428	11254
	7230	8656	9242	7352	9686	8736	9602	13822	10266	6122
	2908	8946	4934	7698	6200	4802	11512	11590	11306	10020
	5180	9026	6842	4976	6754	13596	13946	15585	12714	11094
	7578	6634	6548	8676	10450	10298	13660	10784	14761	9762
5-FAA	310	155	77.5	38.75	19.38	9.69	4.84	2.42	1.21	0
	12	18	18	24	34	590	2080	5376	7228	11728
	14	18	14	24	36	1068	2088	4918	6186	12830
	14	24	18	30	42	434	1434	2408	3410	6976
	16	18	26	26	30	152	996	1822	3784	6084
	28	26	38	40	140	1144	2340	4656	8392	7102
	18	32	34	28	70	756	2128	5480	9948	9856
6-FAA	310	155	77.5	38.75	19.38	9.69	4.84	2.42	1.21	0
	14	20	12	22	48	604	1502	1366	1636	9178
	10	20	16	18	308	1592	770	834	1090	8492
	20	14	8	20	28	936	992	854	1456	9192
	18	22	18	24	258	324	440	812	582	5956
	36	30	24	40	346	2094	4214	3478	3642	10948
	26	24	30	28	268	1402	2196	2178	5808	10222
Ascorbic acid	45000	22500	11250	5625	2812	1406	703	351	176	0
	20	14	20	24	44	750	5066	9240	12126	6666
	16	18	20	22	42	3758	13526	10440	12492	10766
	20	20	32	26	40	1536	3704	7378	7718	5582
	16	16	16	24	298	1800	12372	10818	13024	8932
	32	18	22	34	24	770	5766	4672	4494	6576
	26	28	28	26	50	1104	7716	6714	6330	8298

## Sheet: Figure 3
Fold change in bioluminescence between day 0 and day 7 post treatment - all compounds in mg/L
Pyrazinamide	1000	500	250	125	62.50	31.25	15.63	7.80	3.90	0
	2.16667	3.98569	6.29149	2.86884	3.55343	8.72022	4.3534	4.64772	9.48596	1.47771
	2.23658	1.55057	2.62208	4.14038	6.23699	6.42193	5.65617	5.3141	6.24132	2.60938
	1.76842	2.92412	2.60664	2.83987	10.3956	9.24863	11.102	9.44776	10.5338	4.24688
	1.6455	0.566601	1.75316	4.71231	6.46139	7.00693	5.64892	2.96293	2.66549	2.99937
	2.83851	3.76849	7.52273	8.2616	11.1659	11.0944	8.8194	9.68944	12.4	2.99835
	2.46407	1.04211	2.66595	2.81882	5.92665	6.87907	6.58	5.96658	7.21183	7.30249
Rifampicin	128	64	32	16	8	4	2	1	0.5	0
	0.0244898	0.0213178	0.0347305	0.0398724	0.0337243	0.0478142	0.0972222	0.602594	1.6712	2.97783
	0.0307018	0.0266544	0.0336658	0.0337268	0.0268293	0.0321199	0.0672478	0.661308	2.1528	6.27652
	0.0285714	0.010898	0.0147493	0.0497238	0.0504673	0.0410959	0.178777	0.58	0.69861	3.59195
	0.0248307	0.0228849	0.0157233	0.0348485	0.032967	0.0405965	0.100322	0.513691	0.699248	3.94124
	0.059761	0.0830368	0.109813	0.0846457	0.0805785	0.0687419	0.0964467	0.496513	0.856068	10.5101
	0.0696517	0.0814371	0.0787172	0.0721063	0.060472	0.0456693	0.1471	0.361538	1.42825	10.9138
Isoniazid	256	128	64	32	16	8	4	2	1	0
	0.210801	0.247312	0.337545	0.194203	0.282728	0.140808	0.208074	0.22237	0.338843	6.05076
	0.23085	0.392549	0.234101	0.0587156	0.12069	0.221293	0.382056	0.353191	0.788867	2.08383
	0.0260223	0.0535714	0.280832	0.143639	0.227273	0.0482655	0.213986	0.167873	0.579202	5.90079
	0.611186	0.213771	0.136038	0.601399	0.196271	0.7003	0.139216	0.354639	0.486938	2.58152
	0.0600858	0.570362	0.715068	0.311808	0.45812	0.386482	0.505308	0.493007	0.732692	9.37979
	0.204301	0.775547	0.391304	0.148148	0.190332	0.251244	0.166124	0.439759	0.739631	42.1077
Ethambutol	2000	1000	500	250	125	62.5	32	16	8	0
	0.434198	1.70964	1.16784	1.23822	1.14902	1.18113	1.25819	1.64856	2.57444	6.44262
	1.0354	1.19068	0.677113	1.15047	0.909311	0.793852	1.1988	1.16362	2.64252	3.00459
	0.81018	1.60453	0.863319	1.44551	1.95034	0.740379	2.60806	0.97153	2.12618	5.12252
	0.755435	0.990316	0.937263	1.20796	1.62305	1.62144	4.07278	2.30978	2.74432	3.57637
	1.60765	2.12639	1.83091	1.13715	1.77952	1.8752	1.54443	2.40483	2.83977	9.29718
	0.852398	1.11494	0.757669	0.974811	1.31761	1.43237	0.832168	2.06013	2.48101	4.42185
Streptomycin	2000	1000	500	250	125	62.5	32	16	8	0
	0.0129991	0.0349265	0.0328125	0.0355828	0.0621572	0.232982	0.227591	0.571685	1.62595	3.58743
	0.00960659	0.053701	0.0361248	0.0546022	0.0691057	0.109445	0.162393	0.991031	2.18067	4.63262
	0.0151286	0.0375494	0.0632378	0.041769	0.219917	0.138602	0.699399	0.861976	1.06328	6.54884
	0.0344984	0.0636704	0.0456942	0.060559	0.100202	0.0729858	0.317891	0.624611	1.87414	7.05786
	0.034965	0.0396733	0.0651769	0.0694184	0.112195	0.174397	0.360877	1.04143	1.93606	5.24565
	0.109665	0.0910345	0.120137	0.0876133	0.0763889	0.12605	0.190388	1.00658	1.45714	10.7653
Amikacin	1000	500	250	125	62.50	31.25	15.63	7.80	3.90	0
	0.114538	0.0400891	0.0376176	0.131234	0.0483425	0.0717489	0.950237	0.298558	1.43293	7.2997
	0.0257937	0.0111732	0.019656	0.0260337	0.18169	0.461219	1.31392	0.743504	0.361309	8.48489
	0.0278059	0.0536585	0.100851	0.357859	1.56243	2.27247	4.36057	3.78102	4.136	2.41208
	0.0216754	0.0417482	0.0780998	0.307194	0.4	0.575087	0.971975	1.27581	3.48566	7.60732
	0.0173116	0.00625	0.0450161	0.0590062	0.778443	5.9244	0.469208	9.63369	4.67682	2.21403
	0.0321716	0.0599201	0.112676	0.0864486	0.145863	0.336617	0.107239	2.60816	16.2443	2.77017
Rifabutin	128	64	32	16	8	4	2	1	0.5	0
	0.00418569	0.00889548	0.0215232	0.0215517	0.0308642	0.0289855	0.0429082	0.0167676	0.155658	5.00114
	0.0248619	0.0202231	0.0497573	0.0478781	0.0332805	0.0668016	0.0813559	0.374181	0.713194	21.451
	0.0266789	0.0264317	0.0185081	0.0324385	0.0207539	0.173056	0.497379	1.01049	2.2066	9.19347
	0.0452303	0.0387409	0.0189076	0.0634921	0.192434	0.173913	0.217391	0.310777	1.05733	5.24861
	0.0601504	0.0648649	0.0519126	0.125806	0.0884146	0.104167	0.347578	2.91575	4.11651	5.40362
	0.0381679	0.0465409	0.0317308	0.0394144	0.0887851	0.0971867	0.171146	0.736462	1.09914	3.1245
Pretomanid	40	20	10	5	2.5	1.25	0.63	0.32	0.16	0
	6.8945	4.50043	8.86198	8.05734	4.89931	5.77561	9.48939	9.98129	4.22434	7.54053
	2.71185	3.65857	3.08456	2.36929	3.28255	2.04128	2.9127	6.24361	4.50547	3.27282
	3.30259	2.13273	4.03122	3.46994	4.71383	12.3834	15.892	7.33806	3.45919	8.56803
	0.975962	2.57564	2.51945	9.07755	11.568	10.555	8.1623	6.28453	4.7488	4.5234
	5.64962	4.26915	4.96691	4.86027	6.17494	10.2564	7.10622	5.79294	5.07468	2.56636
	9.71849	5.64468	8.51697	5.53019	6.375	16.5185	13.584	28.1193	9.62362	12.4326
Delamanid	54	27	13.5	6.75	3.4	1.7	0.85	0.4	0.2	0
	0.363571	2.04538	1.41782	4.1255	2.36147	4.1928	8.4336	8.02077	8.8147	4.54811
	0.361366	1.91812	2.05235	5.57749	2.40609	4.79449	8.0908	9.77548	4.70938	1.457
	1.63591	1.99819	5.19783	7.04942	10	2.9136	3.39787	11.2227	9.03529	9.42211
	0.994898	2.21176	7.17685	5.75922	8.06593	8.43995	14.0639	15.7759	13.9062	21.6371
	4.44789	2.02669	9.00507	4.49289	9.19369	8.63687	6.30441	6.7422	5.42259	5.27213
	6.12828	4.29151	3.53316	2.70164	6.65934	6.99825	7.87962	5.65323	6.06362	11.404
SN30488	40	20	10	5	2.5	1.25	0.63	0.32	0.16	0
	3.0122	1.88601	0.23633	0.692795	5.75094	2.6346	3.23341	1.82519	1.7323	4.66045
	0.110672	0.496188	0.904473	1.92511	3.0315	3.72997	6.29386	7.81586	4.25344	3.60311
	0.474867	2.08574	2.6416	5.71404	3.50495	3.94169	3.86671	8.95567	3.75849	4.8087
	0.685126	1.88919	3.08195	2.80423	5.91545	5.241	4.02733	6.35506	7.04567	8.3598
	0.215301	1.46022	7.04276	12.7509	2.60622	4.00316	4.78548	12.9351	5.8519	3.20962
	1.64392	4.48429	5.58658	4.69125	6.77721	6.26261	5.77237	4.33665	7.67227	6.2722
QOA1	128	64	32	16	8	4	2	1	0.5	0
	0.367185	2.46559	2.83357	2.48531	2.47039	4.02361	11.5302	5.89073	4.68591	4.8903
	9.65473	1.79223	0.962042	2.11139	4.92771	3.80134	4.44444	10.6229	15.7531	4.49282
	2.41818	3.8599	4.30573	5.80196	7.17182	9.8258	11.8452	13.1575	13.2519	11.3558
	2.73063	4.52477	5.03989	5.08981	5.34579	11.1323	15.2183	5.83512	7.32601	4.40046
	15.5634	3.52052	4.00683	5.5724	8.81584	8.90942	6.16983	13.6915	19.5053	22.0509
	1.35911	2.29091	5.05224	4.58586	2.82937	11.5367	9.49675	16.8616	8.6934	4.55634
QOA2	128	64	32	16	8	4	2	1	0.5	0
	0.267967	0.594954	0.757949	1.18043	1.50642	1.32584	2.84	11.6782	3.83592	5.45548
	0.240219	1.06437	1.745	0.941788	3.52893	3.31622	4.42093	16.9316	5.20667	4.11972
	1.30899	1.28433	2.23642	3.75182	4.77558	6.70521	9.37265	13.0965	14.8554	3.42542
	1.46382	2.23711	3.36493	4.80288	6.43166	8.92811	11.1024	13.8185	13.6081	6.06925
	5.63158	2.6166	4.27273	7.52529	9.40997	11.3775	12.2704	6.6775	18.9838	16.7766
	9.78834	2.81869	4.16263	10.078	6.52717	9.82229	14.1599	6.70419	16.8626	21.0717
QOA3	128	64	32	16	8	4	2	1	0.5	0
	1.08408	1.40707	2.92385	4.20383	3.33491	1.8814	1.2898	1.97274	3.95277	3.62406
	1.25262	1.21694	1.18686	1.31829	1.32593	1.94086	2.43043	5.20947	1.71301	4.78486
	1.50249	2.0639	2.41558	2.03094	2.56923	2.52048	3.17527	4.02739	3.12988	1.58437
	1.67319	3.24601	4.29044	4.94095	5.58559	3.89141	3.67092	6.85799	13.3325	2.86942
	3.2868	1.81756	2.47182	2.71913	2.83543	5.5	9.12696	7.5	3.6181	2.36647
	7.76434	6.46589	6.62753	8.64143	10.3465	11.2917	13.3659	9.96673	20.2205	18.5589
5-FAA	310	155	77.5	38.75	19.38	9.69	4.84	2.42	1.21	0
	0.0078637	0.00581771	0.00407978	0.0138568	0.00907151	0.0892317	0.825397	2.69609	4.08824	6.56663
	0.0134615	0.00410959	0.00615655	0.011893	0.0101067	0.180405	0.514793	2.18578	3.55517	3.44522
	0.0231023	0.0192926	0.0149254	0.025641	0.0381125	0.306065	1.05286	2.14617	3.27255	3.04629
	0.0220994	0.0163339	0.0221843	0.0188133	0.0268817	0.131034	0.783019	1.80039	3.49078	4.78302
	0.00896861	0.0176871	0.0186275	0.0275862	0.0456323	0.410036	1.20123	3.41349	5.8036	5.79282
	0.0134731	0.0211361	0.0134175	0.0191519	0.0422705	0.496715	1.18618	3.57702	5.7972	3.37303
6-FAA	310	155	77.5	38.75	19.38	9.69	4.84	2.42	1.21	0
	0.00702106	0.0116414	0.00683371	0.0139241	0.023369	0.225541	0.822563	0.791425	0.906874	3.40178
	0.00183486	0.00592066	0.00487508	0.0151771	0.104833	0.251025	0.533241	0.398281	0.446721	11.3529
	0.02331	0.00985915	0.00658979	0.0166389	0.0255009	0.690265	0.732644	0.732418	0.66789	2.98055
	0.0412844	0.00720367	0.009	0.0103627	0.120224	0.271357	0.580475	1.06005	0.941748	2.31751
	0.0275651	0.0222222	0.0166667	0.0261097	0.266154	1.56269	3.01863	3.20849	3.35978	4.58459
	0.0275424	0.0113208	0.02693	0.035533	0.166047	0.306783	4.28906	2.11047	4.28319	5.71061
Ascorbic acid	45000	22500	11250	5625	2812	1406	703	351	176	0
	0.00327547	0.00312919	0.00822368	0.00636605	0.0315638	0.575153	1.192	4.67611	3.90406	7.07643
	0.00953516	0.0186335	0.0154559	0.0062182	0.0379747	1.42673	2.59119	8.4878	10.9771	4.593
	0.0199601	0.00666222	0.025	0.0105263	0.0452489	0.693767	2.3443	11.8237	10.6309	16.133
	0.00428036	0.0050537	0.0111421	0.004456	0.0899215	1.00111	2.56468	4.3031	5.8091	3.70315
	0.0110574	0.00486487	0.00654372	0.0658915	0.0382166	1.24194	11.3953	11.3951	9.44118	2.74457
	0.0460993	0.0242214	0.0255941	0.0205047	0.0407166	1.23767	6.58362	9.12228	7.41218	4.48541
